# Supplementary material
Source: MDPI journal article supplement (https://www.mdpi.com/2075-4698/12/2/49)
Supplement: s1 [file s1]

## Short interview form

Description of respondent (occupation):

Year of birth:

Gender:

Time of interview:

Place of the interview:

---

**QUESTION 1:** What are your feelings about the socialist heritage? Are you nostalgic about that time? How do you perceive the symbols of socialism in your city?

*Instructions: In order to evoke possible positive and negative emotions, we ask about specific symbols, e.g. the statue of Tito, if the respondent is not sure or not familiar with the heritage ...*

General attitude towards these symbols: A) positive B) neutral C) negative

**QUESTION 2:** What is your attitude towards the industrial heritage in your city? How do you see the role of industry in the city today? Are there any specific aspects of industry about which you have particular feelings?

*Instructions: we ask for possible positive or negative connotations. If no clear answer is given or the respondent is unsure, we ask for concrete industrial symbols (e.g. factory objects, values and attitudes).*

General attitude towards these symbols: A) positive B) neutral C) negative

**QUESTION 3:** What do you think of urban policies that emphasise a good quality local environment, tourism, a service-based economy, etc.?

*Instructions: Identify possible positive or negative associations with the prevailing ideas of urban strategies (green environment, new service economy, emphasis on tourism over industry, etc...).*

General attitude towards these symbols: A) positive B) neutral C) negative

## Short interview form

**Table S2.** The structure of respondents and their attitudes towards three dominant themes.

| Status                                                                 | Age | Sex | Attitude of respondents towards 'socialism' | Attitude of respondents towards 'industrialism' | Attitude of respondents towards 'future development strategies' |
|------------------------------------------------------------------------|-----|-----|---------------------------------------------|-------------------------------------------------|-----------------------------------------------------------------|
| unemployed                                                             | 27  | f   | 0                                           | 1                                               | 1                                                               |
| worker                                                                 | 27  | f   | 0                                           | 1                                               | 1                                                               |
| worker                                                                 | 31  | m   | 1                                           | 1                                               | 1                                                               |
| worker                                                                 | 31  | m   | 0                                           | 0                                               | 1                                                               |
| worker                                                                 | 33  | f   | 1                                           | 1                                               | 1                                                               |
| worker                                                                 | 34  | m   | 1                                           | 1                                               | 1                                                               |
| worker                                                                 | 35  | f   | 1                                           | 0                                               | -1                                                              |
| worker                                                                 | 37  | m   | -1                                          | 1                                               | 1                                                               |
| worker                                                                 | 40  | f   | 1                                           | 0                                               | -1                                                              |
| worker                                                                 | 43  | m   | 1                                           | 1                                               | 0                                                               |
| worker                                                                 | 46  | f   | 1                                           | 1                                               | 0                                                               |
| worker                                                                 | 48  | m   | 1                                           | 1                                               | 0                                                               |
| worker                                                                 | 48  | f   | 1                                           | -1                                              | -1                                                              |
| worker                                                                 | 50  | f   | 0                                           | -1                                              | 1                                                               |
| worker                                                                 | 53  | f   | 1                                           | -1                                              | -1                                                              |
| unemployed                                                             | 53  | f   | 0                                           | 1                                               | 0                                                               |
| retiree                                                                | 54  | m   | 1                                           | 1                                               | 1                                                               |
| retiree                                                                | 55  | m   | 0                                           | 1                                               | 0                                                               |
| retiree                                                                | 58  | m   | 1                                           | 0                                               | 1                                                               |
| worker                                                                 | 58  | f   | 0                                           | 1                                               | 1                                                               |
| retiree                                                                | 60  | f   | 0                                           | 1                                               | 1                                                               |
| retiree                                                                | 61  | m   | 1                                           | -1                                              | -1                                                              |
| retiree                                                                | 62  | f   | 0                                           | 1                                               | 1                                                               |
| retiree                                                                | 62  | f   | 1                                           | 1                                               | 1                                                               |
| worker                                                                 | 63  | m   | 1                                           | 1                                               | 0                                                               |
| retiree                                                                | 64  | f   | 1                                           | 1                                               | 1                                                               |
| retiree                                                                | 70  | f   | 1                                           | 1                                               | 1                                                               |
| retiree                                                                | 72  | f   | 0                                           | -1                                              | 1                                                               |
| retiree                                                                | 74  | f   | 1                                           | 1                                               | 1                                                               |
| retiree                                                                | 74  | m   | 0                                           | 1                                               | -1                                                              |
| retiree                                                                | 75  | m   | 0                                           | 1                                               | 1                                                               |
| retiree                                                                | 80  | m   | 1                                           | -1                                              | 0                                                               |
| retiree                                                                | 82  | f   | 1                                           | 1                                               | 0                                                               |
| Total (sum):                                                           |     |     | 19                                          | 17                                              | 13                                                              |
| Legend: 1 positive attitude, 0 neutral attitude, -1: negative attitude |     |     |                                             |                                                 |                                                                 |
