# Supplementary material
Source: MDPI journal article supplement (https://www.mdpi.com/2075-4698/12/2/49)
Supplement: s1 [file s1 › File S1.xlsx]

## Sheet: List1
Name of the sign / symbol	Geographical location	Type of symbol	Relation of the symbol to industrial past/present	State of preservation, location, appearance of the symbol	Relation of the symbol to cultural heritage (protection status, etc.).	Other comments
Name (Factory, Bakery, ...)	coordinates	building, monument, emblem …	Description of the symbol, how it relates to industrialism (past or present), what narrative it conveys	Emplacing' of the symbol, its location, visibility, preservation and care by the local inhabitants	Formal status of the symbol, possible protection regimes, incorporation into museums …	Other facts and observations about the symbol
